1 Real time monitoring of transtibial elevated vacuum  
2 prostheses: a case series on socket air pressure  
3  
4

5 Katherine R. Schoepp<sup>1</sup>, Jonathon S. Schofield<sup>2</sup>, David Home<sup>3</sup>, Michael R. Dawson<sup>1</sup>, Edmond Lou<sup>4</sup>,  
6 McNiel Keri<sup>1</sup>, Paul D. Marasco<sup>2,5</sup>, Jacqueline S. Hebert<sup>1\*</sup>  
7

8 <sup>1</sup> Department of Medicine, Faculty of Medicine and Dentistry  
9 University of Alberta  
10 Edmonton, AB, Canada  
11

12 <sup>2</sup> Department of Biomedical Engineering  
13 Lerner Research Institute  
14 Cleveland, OH, USA  
15

16 <sup>3</sup> Prosthetics and Orthotics Department  
17 Glenrose Rehabilitation Hospital  
18 Edmonton AB, Canada  
19

20 <sup>4</sup> Department of Electrical & Computer Engineering, Faculty of Engineering  
21 University of Alberta  
22 Edmonton, AB, Canada  
23

24 <sup>5</sup> Advanced Platform Technology Center of Excellence  
25 Louis Stokes Cleveland Department of Veterans Affairs Medical Center  
26 Cleveland, OH, USA  
27

28  
29 \* Corresponding author

30 E-mail: [jhebert@ualberta.ca](mailto:jhebert@ualberta.ca) (JSH)

## 31 **Abstract**

32 Elevated vacuum is a prosthetic suspension method used to reduce slippage between the prosthetic socket  
33 and the residual limb. Evaluation of the effectiveness of these systems is limited due to a lack of correlation  
34 to actual socket air pressure, particularly during unconstrained movements. This may explain some of the  
35 variability in functional outcomes reported in the literature. We developed a light-weight portable socket  
36 measurement system to quantify internal socket air pressure, temperature, and acceleration. We  
37 implemented the system onto the sockets of three transtibial prosthesis users with mechanical elevated  
38 vacuum pumps. Participants completed five functional tasks with and without the vacuum pumps actively  
39 connected, including the 2-Minute Walk test, 5-Times Sit-to-Stand test, 4-Square Step test, L-Test, and  
40 Figure-8 test. Results demonstrated that the use of elevated vacuum pumps produced different gait profiles  
41 and pressure ranges for each user, with significant differences between pump conditions. Two of the  
42 participants demonstrated substantially lower air pressure (higher vacuum) over time while the pump was  
43 active compared to inactive. The minimum air pressure measured at the completion of the 2-Minute Walk  
44 test was  $-34.6 \pm 7.7$  kPa, which is not as low as pressures reported in literature during benchtop experiments.  
45 One participant did not show substantial changes in pressure over time for either pump condition.  
46 Functional task performance was not significantly different between pump conditions. Correlation with  
47 accelerometer readings allowed air pressure data to be aligned with the gait cycle; peak positive pressures  
48 occurred just following initial contact of the foot in early stance, and the most negative pressures (vacuum)  
49 were observed throughout swing. This study has demonstrated the use of a portable data logging tool that  
50 may serve the clinical and research communities to quantify the operation of elevated vacuum systems, and  
51 better understand the variability of mechanical pump operation and overall system performance.

## 52 **Introduction**

53 In 2005, there were an estimated 1.6 million people living with an amputation in the United States; this  
54 number is expected to increase to 3.6 million by 2050 (1). Despite advances in prosthetic limb development,  
55 optimal socket fit remains a challenge (2-4). Poor suspension may result in slippage between the socket and  
56 the residual limb, particularly during the cyclical loading and unloading associated with gait, which can  
57 compromise stability (2). This can promote irritation, discomfort, and tissue damage (5). One approach to  
58 minimizing this slippage is using elevated vacuum suction suspension, where sub-atmospheric pressure  
59 (vacuum) is employed to reduce the relative movement of the user's residual limb with their prosthetic  
60 socket (6). In a typical elevated vacuum socket, the residual limb is covered by a gel liner which sits within  
61 a rigid prosthetic socket, and a vacuum is applied through a one-way valve to the space between these layers  
62 to improve their connection. The connection between the liner and residual limb is maintained using a  
63 proximal seal, which is typically either a suspension sleeve or inner sealing gasket (6). Elevated vacuum  
64 systems are predominantly used for attaching lower-limb sockets, though recently there has been  
65 preliminary work showing promise for use in transradial (7) and partial-foot amputation cases (8).

66 Several studies have demonstrated benefits in using elevated vacuum in lower-limb prostheses. When  
67 compared to passive suction sockets, vacuum pumps have been shown to maintain or increase residual limb  
68 volume during gait (9,10). This may be due to changes in socket-limb interface pressure, where the vacuum  
69 reduces positive contact pressures during stance and increases negative air pressures during swing, thereby  
70 increasing the fluid drawn into the limb (11). In support of this theory, bioimpedance analysis demonstrated  
71 an increase in extracellular fluid volume when walking using a transtibial prosthesis with elevated vacuum  
72 (12). Residual limb movement relative to the socket (i.e. pistoning) has been shown to be lower when using  
73 elevated vacuum compared to traditional suction and pin-locking systems, with increasing vacuum  
74 pressures correlated to reduced pistoning (10,13-15). Improved balance and gait when using elevated  
75 vacuum systems has also been demonstrated (10,16,17). Compared to pin-locking and traditional suction  
76 sockets, elevated vacuum has demonstrated improved perfusion and preservation of skin barrier function  
77 after 16 weeks of use (18). In fact, several studies have found that elevated vacuum systems do not preclude

78 wound healing, and allow patients to ambulate sooner and for longer periods of time compared to other  
79 systems (19-21). Generally, elevated vacuum systems are viewed favourably by clinicians, however  
80 questionnaire results have shown that they are perceived as being “more expensive, heavier, less durable,  
81 and require more maintenance” than a standard socket (22). Several review articles have been published in  
82 this area, and while existing evidence for elevated vacuum systems is promising, these reviews have  
83 indicated a need for more controlled studies, larger sample sizes, and evaluation of long-term effects (6,23-  
84 25).

85 Recent findings have shown that the level of vacuum (i.e. negative air pressure) is directly related to the  
86 amount of pistoning (13), and that changes in pressure may be related to quality of socket fit (26). However,  
87 many studies regarding the effectiveness of elevated vacuum do not monitor socket air pressure. Bench-top  
88 testing of both electrical pump systems (27,28) and mechanical elevated vacuum systems (27) highlight  
89 model-specific differences in measures of performance such as maximum gauge pressure and air evacuation  
90 time (27,28). These differences may help to explain variability in study findings, such as in the case series  
91 by Sanders *et al.* that found inconsistent results across different elevated vacuum systems (12). Monitoring  
92 vacuum pressures while wearing a prosthesis with elevated vacuum could possibly shed light on these  
93 differences. For in-lab testing, a pressure monitor (model 2L760, DigiVac, Matawan, NJ) has been used to  
94 quantify socket air pressure (27-29). Because this system is tethered to a computer system and comes with  
95 the cost of increased bulk and weight it may not appropriate for tasks that require free movement, limiting  
96 its use to standing, sitting, and treadmill walking. Xu et al (2017) developed a pressure measurement system  
97 to induce a specific vacuum level in order to study the effect on gait parameters, but did not report the  
98 changes in vacuum pressure throughout the trials (30). The LimbLogic VS Communicator (Ohio Willow  
99 Wood) has been developed to measure socket air pressure in real-time (13,26,31), however it is only  
100 designed to interface with the LimbLogic VS system, limiting its usability across a wider range of systems.  
101 A discrete monitor that could be used across elevated vacuum systems to measure and log socket air  
102 pressure in real-time across of variety of functional tasks could provide valuable quantitative comparisons.

103 To address these limitations, we developed a light-weight portable socket measurement system capable of  
 104 capturing internal socket air pressure, temperature, and acceleration. This system can either log data to  
 105 onboard memory, or stream wirelessly and in real-time to a computer. The objective of this paper is to  
 106 describe the system design, fabrication, and integration of the device, as well as present preliminary results  
 107 from implementation with three transtibial prosthesis users with mechanical elevated vacuum pumps.

## 108 **Methods**

109 Ethics approval was obtained through the University of Alberta's institutional review board and participants  
 110 gave written informed consent prior to participation. Three participants currently using an elevated vacuum  
 111 system in their prosthesis were recruited through prosthetics shops, with details listed in Table 1. Each  
 112 prosthesis was evaluated by a certified prosthetist and was deemed to be well-fitting at the time of testing.  
 113 To confirm quality of fit, participants completed the OPUS Lower Extremity Functional Status Measures  
 114 survey (32), with results ranging from 50 to 70 out of a total possible score of 80.

115 **Table 1. Participant information and prosthetic components.**

|                               | <b>Participant 1</b>                               | <b>Participant 2</b>                         | <b>Participant 3</b>                              |
|-------------------------------|----------------------------------------------------|----------------------------------------------|---------------------------------------------------|
| Participant information       |                                                    |                                              |                                                   |
| Sex                           | Male                                               | Male                                         | Male                                              |
| Weight                        | 225 lbs                                            | 175 lbs                                      | 210 lbs                                           |
| Height                        | 5'11"                                              | 5'10"                                        | 6'2"                                              |
| Amputation information        |                                                    |                                              |                                                   |
| Amputation level              | Transtibial                                        | Transtibial                                  | Transtibial                                       |
| Side of amputation            | Right                                              | Left                                         | Right                                             |
| Type of amputation            | Trauma                                             | Vascular                                     | Vascular                                          |
| Time since amputation         | 4 years, 1 month                                   | 3 years, 4 months                            | 8 years, 4 months                                 |
| Limb length*, geometry        | Short, Conical                                     | Medium, Cylindrical                          | Medium, Cylindrical                               |
| Wear and performance          |                                                    |                                              |                                                   |
| Hours per day prosthesis worn | 16                                                 | 16                                           | 16                                                |
| Days per week prosthesis worn | 7                                                  | 7                                            | 7                                                 |
| OPUS Functional Status Score  | 50 out of 80                                       | 70 out of 80                                 | 69 out of 80                                      |
| Prosthetic components         |                                                    |                                              |                                                   |
| Elevated vacuum system        | Harmony P3 (Ottobock, 4R147=K)                     | Unity Sleeveless Vacuum (Össur)              | Triton H (Ottobock, 1C62, Rt. Cat. 3-4-P4N)       |
| Liner                         | Alpha Design Custom Liner (WillowWood, ALC-DES-EO) | Alpha Classic Liner (WillowWood, ALC-5064-E) | Anatomic 3D PUR Liner (Ottobock, 6Y512=265x125-F) |
| Foot                          | LP Vari-Flex (Össur, 27R C7)                       | Pro-Flex LP Torsion (Össur, PLTO425L)        | Triton H (Ottobock, 1C62, Rt. Cat. 3-4-P4N)       |
| Sleeve                        | Extreme Sleeve (Alps, SFK-28-3)                    | ProFlex Plus Sleeve (Ottobock, 453A=1-0)     | ProFlex Plus Sleeve (Ottobock, 453A40=2-7)        |

| Socket type | Thermoplastic temporary socket                                                                                     | Laminated | Environmentally Managed System, Laminated (EMS) |
|-------------|--------------------------------------------------------------------------------------------------------------------|-----------|-------------------------------------------------|
| 116         | * Note that “short” limb length refers to a tibia length less than 12 cm and “medium” is between 12 and 15 cm (33) |           |                                                 |

## 117 **Design and Installation of Data Logger**

118 The socket data logger was developed in-house and contained three sensors; an air-pressure sensor  
119 (MPXx6250A, Freescale Semiconductor, range: 20 to 250 kPa absolute, reported accuracy:  $\pm 0.25$  kPa), an  
120 external temperature probe (LMT86, Texas Instruments, range:  $-50$  to  $150^{\circ}\text{C}$ , reported accuracy:  $\pm 0.4^{\circ}\text{C}$ ),  
121 and an inertial measurement unit (MPU-9250, InvenSense, range:  $-8$  to  $8$  G, reported accuracy:  $\pm 0.05$  G).  
122 Overall dimensions of the device including housing were  $18 \times 38 \times 51$  mm with a total weight of 27 g. The  
123 device was powered by a lithium polymer battery and communicated using Bluetooth LE in real-time via a  
124 custom graphical user interface (GUI) at a frequency of 25 Hz while, simultaneously logging the data to  
125 internal on-board memory at the same rate for redundancy.

126 Air pressure measurements in the socket were obtained by connecting the sensor to the socket via the  
127 existing tubing (Participants 1 and 3) or exhaust port connector (Participant 2) between the pump and  
128 socket, shown in (Fig 1). A narrow tubing diameter was selected ( $1/16$  inches inner diameter) to ensure that  
129 the inclusion of the data logger would have minimal impact on the overall volume of the prosthetic socket;  
130 the volume increase for a 20 cm length of tubing is  $0.4 \text{ cm}^3$ , relatively small compared to estimated socket  
131 volumes ranging from 33 to  $197 \text{ cm}^3$  (28). Therefore, consistent with Boyle’s law and previous prosthetic  
132 literature (31), air pressure measurements within this additional tubing are equivalent to the air pressure  
133 throughout the prosthetic socket. The temperature probe was placed on the outside of the socket and covered  
134 with the prosthetic liner. The housing containing the inertial measurement unit was mounted to the outside  
135 of the rigid socket, as was the temperature probe.

136 **Fig 1. Installation of data logger onto prosthetic socket.** Modified sockets for (a) Participant 1, (b) Participant 2,  
137 and (c) Participant 3

138

139 Pump performance was evaluated in two conditions; active and inactive. In the active condition, the pump  
140 was connected to the socket as per manufacturer's instructions. In the inactive condition, the connection to  
141 the pump was replaced by a plug, thereby separating the pump from the socket. Trials were double-blinded;  
142 both the participant and researchers did not know the condition of the pump. To ensure the double-blind  
143 condition was maintained, a certified prosthetist was responsible for connecting or disconnecting the pump  
144 between trials and did not communicate the state of the system until after data analysis was complete. A  
145 shroud was placed over the entire prosthetic leg to hide any visual clues. There were however minor  
146 differences in auditory cues in the different pump conditions.

## 147 **Functional Tasks and Subjective Surveys**

148 Five mobility tasks were performed for each trial in the same order. The first task was a 2-Minute Walk  
149 Test, similar to (34), where the participant walked in a large circular hallway (circumference of 190 m) for  
150 two minutes. The total distance travelled was measured using a measuring wheel (Rolatape Measuring  
151 Systems, Model MM-45M). The participant then completed the Five Times Sit-to-Stand test (35), the 4-  
152 Square Step test (36), the L-Test (37), and the Figure-8 test (38); time to task completion, number of steps,  
153 and errors were determined from analysis of video footage. At the beginning of the test session, task  
154 instructions were provided to the participant and they were given the opportunity to practice each task until  
155 comfortable with their performance. This was done to minimize potential learning effects during the trials.  
156 During each trial, the 2-Minute Walk test and 5-Times Sit-to-Stand test were completed once, and the 4-  
157 Square Step test, L-Test, and Figure-8 test were completed twice.

158 At the beginning of each trial, the prosthetist connected or disconnected the pump in a room separate from  
159 the participant and researchers. Each condition (pump active or inactive) was evaluated twice for a total of  
160 four trials, with order of condition block randomized in pairs. Participants were asked to don their prosthesis  
161 as usual, then they completed the functional tasks outlined in the order above. If a mistake was made during  
162 one of the functional tasks, that specific task was repeated immediately. Once the functional testing was

163 complete, participants were asked to doff their prosthesis, and a seated break of at least five minutes was  
164 enforced prior to the next trial.

165 After each trial the participant completed a short survey to capture their impressions of the prosthesis under  
166 the current condition. The survey was modified from the OPUS Satisfaction with Device Score (39), and  
167 used a 5-point Likert scale, from 1 (strongly disagree) to 5 (strongly agree), shown in the supplementary  
168 file (S1 Table).

## 169 **Data Treatment**

170 Analysis was conducted using Excel (Microsoft, 2016) and Matlab (Mathworks, R2017b). Gauge pressure  
171 data and acceleration magnitudes were analyzed. For each of the activities, data was broken into individual  
172 movements of the gait cycle (i.e. strides) by delineating at maximum pressures within the approximate  
173 stride period specified; note that data segments were shifted forward by 10 timesteps (0.4 s) to visually  
174 capture the data surrounding the peaks in pressure. The exception is for the sit-to-stand motion where  
175 minimum pressures were used to separate movements. The data was then normalized over movement  
176 length, creating a scale of 0 to 100% movement completion that allowed for the data to be plotted by  
177 condition. Pressure change over time was calculated by determining the slope of the data using simple linear  
178 regression. From each individual movement, average and standard deviation values were determined. Two-  
179 sample t-tests were used to evaluate differences between active compared to inactive conditions, with  
180 variance conditions confirmed using f-tests, and  $\alpha = 0.05$ . Note that Trial 4 from Participant 3 was excluded  
181 from the analysis due to technical challenges resulting from the donning process that resulted in inadequate  
182 seal from the sleeve, compromising the suction suspension.

## 183 **Results**

184 Gauge pressure data collected during the 2-Minute Walk test for each participant are shown in Fig 2. The  
185 thin lines indicate the real-time pressure measurements, which fluctuated substantially with each stride. The



186 thick lines indicate the overall change in pressure. For Participant 1 (Fig 2a), the pressure remained fairly  
187 consistent, regardless of pump condition. For Participant 2 (Fig 2b), in both conditions the pressure dropped  
188 (vacuum increased) initially, then stabilized to different values depending on pump condition. For  
189 Participant 3 (Fig 2c), the pressure was fairly consistent when the pump was inactive and fell continuously  
190 when the pump was active.

191 **Fig 2. Overall gauge pressure data during 2-minute walk test.** Data is shown across (a) Participant 1, (b)  
192 Participant 2, and (c) Participant 3. Thin lines indicate raw data and thick lines indicate measurements smoothed  
193 using the rloess function in Matlab.

194  
195 Data for the 2-minute walk test was broken into individual strides as shown in Fig 3. Early strides are  
196 indicated in blue with later strides in yellow. This visualization demonstrates differences in vacuum  
197 pressures over time. In the case of Participant 1 (Fig 3a), the use of elevated vacuum (pump active) appeared  
198 to reduce the variations in pressure occurring with each stride, but not the overall pressures. For Participant  
199 2 (Fig 3b) there was a reduction in overall gauge pressure (increase in vacuum) with subsequent strides in  
200 both conditions, with more consistently negative vacuum pressures with the pump active. For Participant 3  
201 (Fig 3c), there was a clear effect of the active pump condition showing progressive reduction in pressures  
202 with subsequent strides, compared to the no pump condition which show little to no change.

203 **Fig 3. Individual gauge pressure stride data during 2-Minute Walk test.** Data is shown with pump inactive (top)  
204 and pump active (bottom), across (a) Participant 1, (b) Participant 2, and (c) Participant 3. Blue indicates the first  
205 stride and yellow the last, with the legend indicating total stride count.

206  
207 Average gauge pressure and acceleration data for the 2-Minute Walk test are shown in Fig 4, normalized  
208 over the full stride length. As above, Participant 1 (Fig 4a) visually showed small differences in absolute  
209 pressure between conditions, and lower pressure variation with the pump active. Participants 2 (Fig 4b) and  
210 3 (Fig 4c) showed large differences in pressure between conditions, where the active elevated vacuum

211 reduced overall pressure. Across all three participants, peaks in pressure were followed by drops; these  
 212 drops coincided with stable acceleration measurements, where acceleration magnitude was close to 1.0 G.

213 **Fig 4. Normalized individual stride data during 2-Minute Walk test.** Data is shown for gauge pressure (top) and  
 214 magnitude of acceleration (bottom), across (a) Participant 1, (b) Participant 2, and (c) Participant 3. Dark lines  
 215 indicate average measurements, with shaded areas indicating standard deviation.

216  
 217 Values and statistical results from the data analysis of gauge pressure and acceleration for all five tasks are  
 218 presented in Table 2. There were some significant differences in acceleration magnitude between  
 219 conditions, though effect size may not be clinically significant. In general, gauge pressure was consistently  
 220 lower (vacuum higher) while the elevated vacuum system was active, though the effect size varied by  
 221 participant and activity. Differences between pump active and inactive were smaller during the shorter  
 222 duration tasks compared to the 2-Minute Walk test.

223 **Table 2. Average measured results over individual strides.** Reported as mean  $\pm$  standard deviation. Significant  
 224 differences are highlighted. Abbreviations are as follows: press. (pressure), accel. (acceleration), mag. (magnitude).

|                      |                            | Participant 1  |                |         | Participant 2  |                 |         | Participant 3  |                 |         |
|----------------------|----------------------------|----------------|----------------|---------|----------------|-----------------|---------|----------------|-----------------|---------|
|                      |                            | Inactive       | Active         | P-value | Inactive       | Active          | P-value | Inactive       | Active          | P-value |
| 2-Minute Walk        | Gauge press. (kPa)         | 8.5 $\pm$ 2.9  | 4.6 $\pm$ 1.3  | < 0.001 | -0.1 $\pm$ 1.4 | -21.7 $\pm$ 3.2 | < 0.001 | 0.1 $\pm$ 0.3  | -12.4 $\pm$ 6.7 | < 0.001 |
|                      | Accel. mag. (G)            | 1.2 $\pm$ 0.1  | 1.3 $\pm$ 0.0  | < 0.001 | 1.3 $\pm$ 0.1  | 1.4 $\pm$ 0.1   | < 0.001 | 1.3 $\pm$ 0.1  | 1.3 $\pm$ 0.1   | 0.743   |
|                      | Press. change (kPa / min.) | 1.6 $\pm$ 0.3  | -0.5 $\pm$ 0.2 | 0.016   | -1.6 $\pm$ 0.0 | -2.6 $\pm$ 0.5  | 0.096   | 0.1 $\pm$ 0.2  | -11.7 $\pm$ 0.0 | 0.014   |
| 5 Times Sit-to-Stand | Gauge press. (kPa)         | 2.7 $\pm$ 0.7  | 0.6 $\pm$ 0.4  | < 0.001 | -0.7 $\pm$ 0.5 | -4.0 $\pm$ 2.9  | 0.042   | -1.8 $\pm$ 1.1 | -10.1 $\pm$ 1.0 | < 0.001 |
|                      | Accel. mag. (G)            | 1.0 $\pm$ 0.00 | 1.0 $\pm$ 0.01 | 0.193   | 1.0 $\pm$ 0.00 | 1.0 $\pm$ 0.01  | 0.112   | 1.0 $\pm$ 0.01 | 1.0 $\pm$ 0.00  | 0.303   |
| 4-Square Step Test   | Gauge press. (kPa)         | 5.7 $\pm$ 4.0  | 6.6 $\pm$ 2.9  | 0.264   | 1.3 $\pm$ 5.0  | -5.7 $\pm$ 4.7  | < 0.001 | 0.8 $\pm$ 1.0  | -4.5 $\pm$ 1.2  | < 0.001 |
|                      | Accel. mag. (G)            | 1.2 $\pm$ 0.13 | 1.1 $\pm$ 0.03 | < 0.001 | 1.2 $\pm$ 0.12 | 1.1 $\pm$ 0.11  | 0.311   | 1.1 $\pm$ 0.05 | 1.1 $\pm$ 0.04  | 0.919   |
| L-Test               | Gauge press. (kPa)         | 9.3 $\pm$ 3.3  | 7.0 $\pm$ 2.9  | < 0.001 | 7.0 $\pm$ 6.2  | -11.0 $\pm$ 5.6 | < 0.001 | 0.9 $\pm$ 0.7  | -4.3 $\pm$ 1.1  | < 0.001 |
|                      | Accel. mag. (G)            | 1.3 $\pm$ 0.16 | 1.2 $\pm$ 0.07 | < 0.001 | 1.3 $\pm$ 0.12 | 1.3 $\pm$ 0.13  | 0.521   | 1.2 $\pm$ 0.08 | 1.2 $\pm$ 0.10  | 0.207   |
| Figure-8 Test        | Gauge press. (kPa)         | 7.7 $\pm$ 4.6  | 6.0 $\pm$ 1.9  | 0.149   | 3.4 $\pm$ 3.4  | -9.3 $\pm$ 3.5  | < 0.001 | 0.2 $\pm$ 0.6  | -2.9 $\pm$ 0.9  | < 0.001 |
|                      | Accel. mag. (G)            | 1.3 $\pm$ 0.16 | 1.3 $\pm$ 0.12 | 0.433   | 1.2 $\pm$ 0.11 | 1.3 $\pm$ 0.10  | 0.282   | 1.2 $\pm$ 0.06 | 1.2 $\pm$ 0.07  | 0.586   |

225  
 226 For further insight into differences with vacuum pressures during the 2-Minute Walk test, we analyzed the  
 227 first 5 and last 5 strides of the task (Table 3). In all instances, there were significant differences in gauge  
 228 pressure between the active versus inactive conditions. Differences in pressures between the active and  
 229 inactive conditions were more pronounced for the last 5 strides of the test compared to the first 5 strides,  
 230 particularly for Participants 2 and 3. Notably, the maximum air pressure for Participant 2 and 3 for the last  
 231 5 strides of the task with the pump active maintained negative values, meaning that the socket was sub-

232 atmospheric throughout the entire gait profile, in contrast to the positive values in the inactive pump  
 233 condition.

234 **Table 3. Average gauge pressure data across initial and final strides during 2-Minute Walk.** Reported as mean  
 235  $\pm$  standard deviation. Significant differences are highlighted.

|                   |                   | Participant 1   |                 |         | Participant 2   |                 |         | Participant 3  |                 |         |
|-------------------|-------------------|-----------------|-----------------|---------|-----------------|-----------------|---------|----------------|-----------------|---------|
|                   |                   | Inactive        | Active          | P-value | Inactive        | Active          | P-value | Inactive       | Active          | P-value |
| Initial 5 strides | Min. press. (kPa) | -13.8 $\pm$ 2.0 | -18.5 $\pm$ 1.2 | < 0.001 | -24.9 $\pm$ 1.9 | -28.9 $\pm$ 5.3 | 0.022   | -9.8 $\pm$ 0.7 | -10.1 $\pm$ 0.3 | 0.005   |
|                   | Max. press. (kPa) | 58.1 $\pm$ 10.9 | 66.7 $\pm$ 7.2  | 0.035   | 38.6 $\pm$ 3.6  | 4.3 $\pm$ 5.2   | < 0.001 | 15.0 $\pm$ 0.9 | 9.6 $\pm$ 0.6   | 0.001   |
| Final 5 strides   | Min. press. (kPa) | -12.9 $\pm$ 1.8 | -20.5 $\pm$ 1.7 | < 0.001 | -27.5 $\pm$ 3.2 | -34.6 $\pm$ 7.7 | 0.002   | -9.3 $\pm$ 0.4 | -28.3 $\pm$ 0.1 | < 0.001 |
|                   | Max. press. (kPa) | 54.5 $\pm$ 3.4  | 61.8 $\pm$ 4.3  | 0.007   | 20.0 $\pm$ 1.7  | -12.2 $\pm$ 1.8 | < 0.001 | 15.7 $\pm$ 0.8 | -13.5 $\pm$ 1.0 | < 0.001 |

236  
 237 Temperature measurements of the external socket ranged between 22 and 27°C, however there was no  
 238 correlation to pump condition.

239 Functional task performances are summarized in the supplementary material (S2 Table). There were no  
 240 significant differences in performances based on pump condition ( $p > 0.05$  for all comparisons). Functional  
 241 task performance in both conditions and across all participants fell within normative walking distances  
 242 during the 2-Minute Walk test (34). Performance during the L-Test and Figure-8 test exceeded reported  
 243 values based on populations of transtibial amputees and people with mobility disabilities, respectively  
 244 (37,38). Task durations of the 5 Times Sit-to-Stand and 4-Square Step tests were longer than values reported  
 245 in normative adult populations (36,40).

246 Responses to the qualitative survey are summarized in Fig 5. Despite our attempts to blind the participants  
 247 to the condition of the pump, Participant 1 was able to correctly identify pump condition in all trials. Survey  
 248 responses of Participant 1 indicated a preference towards the use of the elevated pump, with a perceived  
 249 improvement in prosthesis fit and comfort, reduced pain and perception of slippage, as well as a greater  
 250 feeling of control. Participant 2 misidentified the pump conditions for Trials 1 and 2 and was correct for  
 251 Trials 3 and 4. Participant 3 misidentified every pump condition. Survey responses from Participants 2 and  
 252 3 did not indicate a clear preference towards either pump condition.

253 **Fig 5. Comparison of qualitative survey scores.** Solid colour bars indicate inactive pump condition scores and  
254 hatched bars indicate active pump condition scores, with error bars indicating standard deviation

255

## 256 **Discussion**

257 We have developed and applied a device that is able to capture real-time socket pressure and acceleration  
258 data while worn non-intrusively and without restricting mobility. This study has demonstrated the  
259 performance of the data logger and allowed for the evaluation of air pressure within three different  
260 mechanical elevated vacuum systems while worn and performing standardized functional mobility tasks.  
261 The use of the pumps resulted in significant changes to socket air pressure over time, where each participant  
262 demonstrated different gait profiles and pressure ranges.

263 With the pump active, both Participants 2 and 3 demonstrated a substantial decrease in socket air pressure  
264 over the duration of the 2-Minute Walk test. For Participant 2, the air pressure dropped then plateaued after  
265 approximately 50 steps. However, for Participant 3, the pressure dropped continually over the duration of  
266 the trial. The air pressure in both participants' sockets reached a similar final negative pressure range at the  
267 end of the task. With the pump inactive, the air pressure values at the end of the trials were similar to those  
268 at the beginning; the maximum pressure continued to fluctuate above atmospheric pressure. However, with  
269 the pump active, air pressure readings were consistently negative for the final 5 strides, indicating that the  
270 elevated vacuum was maintaining a sub-atmospheric pressure throughout the full stride. Interestingly, these  
271 two participants had difficulties distinguishing when the pump was active, and questionnaire results did not  
272 show a clear preference towards either condition. It was surprising that the participants with apparently  
273 effective vacuum systems could not accurately detect when the pump was active.

274 In contrast, the air pressure in Participant 1's socket did not change substantially over the 2-Minute Walk  
275 test, in both active and inactive pump conditions. However, with the pump active there was a more  
276 consistent pressure profile. This participant was the most successful at correctly identifying pump condition,

277 and questionnaire results indicated a strong preference towards the pump being active. Differences between  
278 participants may be due to a combination of factors other than pump design, including socket fit and  
279 material properties, limb geometry, donning process, and gait pattern, to name a few. In particular, this  
280 participant had a short conical limb with less soft tissue coverage, in comparison to the other 2 participants.  
281 Future work should investigate the effect of soft tissue compliance and volume on effectiveness of vacuum  
282 systems.

283 Similar pressure trends were seen during the other walking-based tasks (Figure-8 and L-test), though they  
284 were not as pronounced due to the shorter task duration. Some average acceleration magnitudes were  
285 significantly different between conditions; however, these differences were very small and may not be  
286 clinically relevant. The 5-Times Sit-to-Stand activity yielded lower variance in pressure and acceleration  
287 compared to other activities, likely because the prosthetic leg was planted against the floor rather than  
288 suspended from the limb in swing phase.

289 Using the measured acceleration readings, changes in socket air pressure can be roughly correlated to  
290 phases of the gait cycle. Willemsen *et al.* demonstrated that stable accelerations equivalent to gravity  
291 correspond to stance, variable readings to swing, and that peaks occur during push off and foot down (41).  
292 We can therefore infer that peak positive pressures occurred just following initial contact of the foot in early  
293 stance, with pressure decreasing during stance. The most negative pressures (highest vacuum) were  
294 observed throughout swing. This is similar to the pressure profiles measured by Chino *et al.*, where nine  
295 transtibial amputees using suction sleeves were evaluated (42). It may be valuable in future work to  
296 synchronize the pressure profiles with specific phases of the gait cycle.

297 Pressure ranges reported in literature vary depending on the type of pump used. Our measured results did  
298 not attain negative pressures as low as the benchtop testing conducted by Komolafe *et al.* (28), which  
299 evaluated different mechanical pumps using a material testing system and found that a vacuum pressure of  
300 -57.6 kPa could be achieved in less than 50 loading cycles or 80 seconds. Xu *et al.* (30) recommended a

301 moderate level of 50 kPa to optimize comfort and gait symmetry; their pressures were manually pulled  
302 rather than induced by the mechanical pump. The minimum pressures observed at the completion of the 2-  
303 Minute Walk test during our study were  $-34.6 \pm 7.7$  kPa. This may be due to differences between idealistic  
304 'bench-top' testing conditions and real-world prosthetic sockets worn by participants; loading profiles and  
305 rates were substantially different, and it is likely that the seal of a socket on an amputated limb is inferior  
306 to an idealized system. Chino *et al.* found minimum pressures using a suction sleeve ranged between -7 and  
307 -31 kPa over ten gait cycles (42). In contrast, air pressures created by electrical elevated vacuum pumps  
308 have been reported to range between -27 to -85 kPa (9-11,13,19,20,26,27,29,31). This disparity indicates  
309 there may be large differences in air pressure between systems, and more evaluation is needed to better  
310 understand the impact of these differences on prosthesis user function.

311 Functional task performances were compared to reported data. All three participants met or exceeded  
312 reported scores for the walking-based tasks (2-Minute Walk, L-Test, and Figure-8) but demonstrated  
313 reduced performance for both the 5 Times Sit-to-Stand and 4-Square Step tests. There were no significant  
314 differences in task performances between pump conditions, suggesting that the short-term use of elevated  
315 vacuum may not have a measurable impact on functional mobility. This is in contrast with the more longer  
316 term study conducted by Samitier *et al.* (17) that found improvements in functional task scores of 16  
317 transtibial participants after 4-weeks of training with an elevated vacuum system, when compared to their  
318 previous system.

## 319 **Future Work**

320 The data logger tool, testing protocols, and analyses presented contribute to the clinical and research  
321 communities by helping to quantify the operation of elevated vacuum systems, and to bridge the gap  
322 between the measurement of mechanical pump operation and overall system performance and function.

323 This study quantified socket air-pressure across three elevated vacuum systems within worn prosthetic  
324 sockets, during specific tasks allowing unconstrained walking in the clinical lab environment. The next step

325 is to study trends over longer periods of time outside of the laboratory or clinical setting. This will allow  
326 further inferences regarding the pressure changes that occur within a socket not only during various  
327 movements, but also during daily living tasks and throughout a longer wearing time. The on-board  
328 acceleration measurements could be used to determine compliance, activity level, or to monitor falls, as  
329 suggested in literature (43,44). The temperature sensor may provide insight into the impact of different  
330 environments on vacuum performance; inclusion of a second temperature probe could allow differences in  
331 internal socket temperature and environmental temperature to be studied. It may also be interesting to  
332 integrate our system with additional sensors, such as limb-socket interface pressure sensors or strain gauge  
333 sensors to quantify forces and moments applied to the prosthesis and residual limb (44).

334 Future work may also involve determining correlations between socket air pressure and measurements of  
335 the residual limb. For example, residual limb volume loss has been demonstrated in seated (9) and standing  
336 (12) tasks. It would be valuable to understand how this loss may be related to average pressures versus  
337 cyclical pressure changes, and also to different soft tissue characteristics of residual limbs. It will be  
338 valuable to investigate pressure differences between mechanical and electrical pumps, as electrical pumps  
339 may be set to greater vacuum pressures than the mechanical pumps evaluated in this study, and will likely  
340 generate different pressure profiles.

341 In the future, these techniques should be useful for clinicians, developers, and researchers to address  
342 questions related to elevated vacuum system performance. As a clinical tool, this could be used to quickly  
343 identify leaks in a socket, understand user compliance, and determine trends in performance throughout the  
344 day. There is also a potential for benefit in remote health-care applications (44), or to provide information  
345 to developers regarding the impact of various prosthetic components and manufacturing techniques.

## 346 **Acknowledgements**

347 The authors would like to thank the Glenrose Rehabilitation Hospital for providing space to conduct the  
348 testing as well as the following prosthetics shops for their assistance with participant recruitment:

349 Edmonton Prosthetic Services, Northern Alberta Limb, and the Prosthetic and Orthotic Care Company.  
350 They also acknowledge Ossur for loaning the plate (Ossur Icelock 544 Plate Unity) used to collect data  
351 for Participant 2. Thank you to Stéphane Magnan and Fraaz Kamal for their assistance with developing  
352 the data logger.

## 353 **References**

- 354 (1) Ziegler-Graham K, MacKenzie EJ, Ephraim PL, Travison TG, Brookmeyer R. Estimating the  
355 prevalence of limb loss in the United States: 2005 to 2050. *Arch Phys Med Rehabil* 2008 Mar;89(3):422-  
356 429.
- 357 (2) Mak AFT, Zhang M, Boone DA. State-of-the-art research in lower-limb prosthetic biomechanics-  
358 socket interface: A review. *J Rehabil Res Dev* 2001;38(2):161-173.
- 359 (3) Legro MW, Reiber G, del Aguila M, Ajax MJ, Boone DA, Larsen JA, et al. Issues of importance  
360 reported by persons with lower limb amputations and prostheses. *J Rehabil Res Dev* 1999 Jul;36(3):155-  
361 163.
- 362 (4) Klute GK, Kantor C, Darrouzet C, Wild H, Wilkinson S, Iveljic S, et al. Lower-limb amputee needs  
363 assessment using multistakeholder focus-group approach. *J Rehabil Res Dev* 2009;46(3):293-304.
- 364 (5) Levy W. Chapter 26: Skin Problems of the Amputee. In: Bowrker JH, Michael JW, editors. *Atlas of*  
365 *Prosthetics: Surgical, Prosthetic, and Rehabilitation Principles*: Mosby Year Book; 1992.
- 366 (6) Kahle JT, Orriola JJ, Johnston WJ, Highsmith MJ. The effects of vacuum-assisted suspension on  
367 residual limb physiology, wound healing, and function: A systematic review. *Technology & Innovation*  
368 2014;15:333-341.



- 369 (7) Lang M, Coyers D. Utilization of negative pressure for socket suspension in upper extremity  
370 prosthetics. MEC 2008.
- 371 (8) Arndt B, Caldwell R, Fatone S. Use of a partial foot prosthesis with vacuum-assisted suspension: A  
372 case study. J Prosthet Orthot 2011;23(2):82-88.
- 373 (9) Goswami J, Lynn R, Street G, Harlander M. Walking in a vacuum-assisted socket shifts the stump  
374 fluid balance. Prosthet Orthot Int 2003 Aug;27(2):107-113.
- 375 (10) Board WJ, Street GM, Caspers C. A comparison of trans-tibial amputee suction and vacuum socket  
376 conditions. Prosthet Orthot Int 2001;25(3):202-209.
- 377 (11) Beil TL, Street GM, Covey SJ. Interface pressures during ambulation using suction and vacuum-  
378 assisted prosthetic sockets. J Rehabil Res Dev 2002 Nov-Dec;39(6):693-700.
- 379 (12) Sanders JE, Harrison DS, Myers TR, Allyn KJ. Effects of elevated vacuum on in-socket residual  
380 limb fluid volume: Case study results using bioimpedance analysis. J Rehabil Res Dev 2011;48(10):1231-  
381 1248.
- 382 (13) Gerschutz MJ, Hayne ML, Colvin JM, Denune JA. Dynamic effectiveness evaluation of elevated  
383 vacuum suspension. J Prosthet Orthot 2015;27(4):161-165.
- 384 (14) Klute GK, Berge JS, Biggs W, Pongnumkul S, Popovic Z, Curlless B. Vacuum-assisted socket  
385 suspension compared with pin suspension for lower extremity amputees: effect on fit, activity, and limb  
386 volume. Arch Phys Med Rehabil 2011 Oct;92(10):1570-1575.
- 387 (15) Darter BJ, Sinitski K, Wilken JM. Axial bone-socket displacement for persons with a traumatic  
388 transtibial amputation: The effect of elevated vacuum suspension at progressive body-weight loads.  
389 Prosthet Orthot Int 2016;40(5):552-557.

- 390 (16) Kuntze Ferreira AE, Neves EB. A comparison of vacuum and KBM prosthetic fitting for unilateral  
391 transtibial amputees using the Gait Profile Score. *Gait Posture* 2015;41(2):683-687.
- 392 (17) Samitier CB, Guirao L, Costea M, Camos JM, Pleguezuelos E. The benefits of using a vacuum-  
393 assisted socket system to improve balance and gait in elderly transtibial amputees. *Prosthet Orthot Int*  
394 2016 Feb;40(1):83-88.
- 395 (18) Rink C, Wernke MM, Powell HM, Gynawali S, Schroeder RM, Kim J, et al. Elevated vacuum  
396 suspension preserves residual-limb skin health in people with lower-limb amputation: Randomized  
397 clinical trial. *J Rehabil Res Dev* 2016;53(6):1121-1132.
- 398 (19) Hoskins RD, Sutton EE, Kinor D, Schaeffer JM, Fatone S. Using vacuum-assisted suspension to  
399 manage residual limb wounds in persons with transtibial amputation: A case series. *Prosthet Orthot Int*  
400 2014;38(1):68-74.
- 401 (20) Trallesi M, Delussu AS, Fusco A, Iosa M, Averna T, Pellegrini R, et al. Residual limb wounds or  
402 ulcers heal in transtibial amputees using an active suction socket system. A randomized controlled study.  
403 *Eur J Phys Rehabil Med* 2012;48(4):613-623.
- 404 (21) Brunelli S, Averna T, Delusso S, Trallesi M. Vacuum assisted socket system in transtibial  
405 amputees: Clinical report. *Orthopädie-Technik Quarterly* 2009:2.
- 406 (22) Gholizadeh H, Lemaire ED, Eshraghi A. The evidence-base for elevated vacuum in lower limb  
407 prosthetics: Literature review and professional feedback. *Clin Biomech* 2016/07;37:108-116.
- 408 (23) Safari MR, Meier MR. Systematic review of effects of current transtibial prosthetic socket designs-  
409 Part 1: Qualitative outcomes. *J Rehabil Res Dev* 2015;52(5):491-508.

- 410 (24) Safari MR, Meier MR. Systematic review of effects of current transtibial prosthetic socket designs--  
411 Part 2: Quantitative outcomes. *J Rehabil Res Dev* 2015;52(5):509-526.
- 412 (25) Gholizadeh H, Lemaire ED, Eshraghi A. The evidence-base for elevated vacuum in lower limb  
413 prosthetics: Literature review and professional feedback. *Clin Biomech (Bristol, Avon)* 2016 Aug;37:108-  
414 116.
- 415 (26) Wernke MM, Schroeder RM, Haynes ML, Nolt LL, Albury AW, Colvin JM. Progress Toward  
416 Optimizing Prosthetic Socket Fit and Suspension Using Elevated Vacuum to Promote Residual Limb  
417 Health. *Adv Wound Care (New Rochelle)* 2017 Jul 1;6(7):233-239.
- 418 (27) Major MJ, Caldwell R, Fatone S. Comparative effectiveness of electric vacuum pumps for creating  
419 suspension in transfemoral sockets. *J Prosthet Orthot* 2015;27(4):149-153.
- 420 (28) Komolafe O, Wood S, Caldwell R, Hansen A, Fatone S. Methods for characterization of mechanical  
421 and electrical prosthetic vacuum pumps. *J Rehabil Res Dev* 2013;50(8):1069-1078.
- 422 (29) Major MJ, Caldwell R, Fatone S. Evaluation of a Prototype Hybrid Vacuum Pump to Provide  
423 Vacuum-Assisted Suspension for Above-Knee Prostheses. *J Med Device* 2015 Dec;9(4):0445041-  
424 445044.
- 425 (30) Xu H, Greenland K, Bloswick D, Zhao J, Merryweather A. Vacuum level effects on gait  
426 characteristics for unilateral transtibial amputees with elevated vacuum suspension. *Clin Biomech*  
427 (Bristol, Avon) 2017 Mar;43:95-101.
- 428 (31) Gerschutz MJ, Haynes ML, Colvin JM, Nixon D, Denune JA, Schober G. A vacuum suspension  
429 measurement tool for use in prosthetic research and clinical outcomes: Validation and analysis of vacuum  
430 pressure in a prosthetic socket. *J Prosthet Orthot* 2010;22(3):172-176.

- 431 (32) Heinemann AW, Bode RK, O'Reilly C. Development and measurement properties of the Orthotics  
432 and Prosthetics Users' Survey (OPUS): a comprehensive set of clinical outcome instruments. *Prosthet*  
433 *Orthot Int* 2003 Dec;27(3):191-206.
- 434 (33) Arwert HJ, van Doorn-Loogman MH, Koning J, Terburg M, Rol M, Roebroek ME. Residual-limb  
435 quality and functional mobility 1 year after transtibial amputation caused by vascular insufficiency. *J*  
436 *Rehabil Res Dev* 2007;44(5):717-722.
- 437 (34) Bohannon RW, Wang YC, Gershon RC. Two-minute walk test performance by adults 18 to 85 years:  
438 normative values, reliability, and responsiveness. *Arch Phys Med Rehabil* 2015 Mar;96(3):472-477.
- 439 (35) Guralnik JM, Simonsick EM, Ferrucci L, Glynn RJ, Berkman LF, Blazer DG, et al. A Short Physical  
440 Performance Battery Assessing Lower Extremity Function: Association With Self-Reported Disability  
441 and Prediction of Mortality and Nursing Home Admission. *J Gerontol* 1994 03/01;49(2):M85-M94.
- 442 (36) Dite W, Temple VA. A clinical test of stepping and change of direction to identify multiple falling  
443 older adults. *Arch Phys Med Rehabil* 2002 Nov;83(11):1566-1571.
- 444 (37) Deathe AB, Miller WC. The L test of functional mobility: measurement properties of a modified  
445 version of the timed "up & go" test designed for people with lower-limb amputations. *Phys Ther* 2005  
446 Jul;85(7):626-635.
- 447 (38) Hess RJ, Brach JS, Piva SR, VanSwearingen JM. Walking skill can be assessed in older adults:  
448 validity of the Figure-of-8 Walk Test. *Phys Ther* 2010 Jan;90(1):89-99.
- 449 (39) Shirley Ryan AbilityLab. Satisfaction With Device Score. Orthotics Prosthetics Users Survey 2015.
- 450 (40) Bohannon RW. Reference values for the five-repetition sit-to-stand test: a descriptive meta-analysis  
451 of data from elders. *Percept Mot Skills* 2006 Aug;103(1):215-222.

452 (41) Willemsen AT, Bloemhof F, Boom HB. Automatic stance-swing phase detection from accelerometer  
453 data for peroneal nerve stimulation. IEEE Trans Biomed Eng 1990 Dec;37(12):1201-1208.

454 (42) Chino N, Pearson JR, Cockrell JL, Mikishko HA, Koepke GH. Negative pressures during swing  
455 phase in below-knee prostheses with rubber sleeve suspension. Arch Phys Med Rehabil 1975  
456 Jan;56(1):22-26.

457 (43) Redfield MT, Cagle JC, Hafner BJ, Sanders JE. Classifying Prosthetic Use via Accelerometry in  
458 Persons with Trans-Tibial Amputations. J Rehabil Res Dev 2013;50(9):1201-1212.

459 (44) Hafner BJ, Sanders JE. Considerations for development of sensing and monitoring tools to facilitate  
460 treatment and care of persons with lower-limb loss: a review. J Rehabil Res Dev 2014;51(1):1-14.

461

## 462 **Supporting Information**

463 **S1 Table. Qualitative survey questionnaire.** Modified from the OPUS Satisfaction with Device Score  
464 (39).

465 **S2 Table. Functional mobility task results.** Functional task performance across entire trial, reported as  
466 mean  $\pm$  standard deviation.

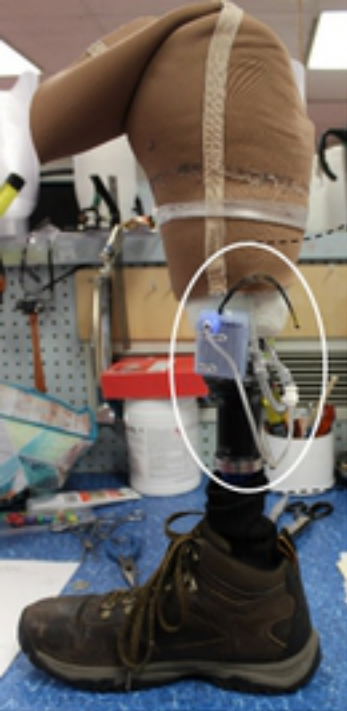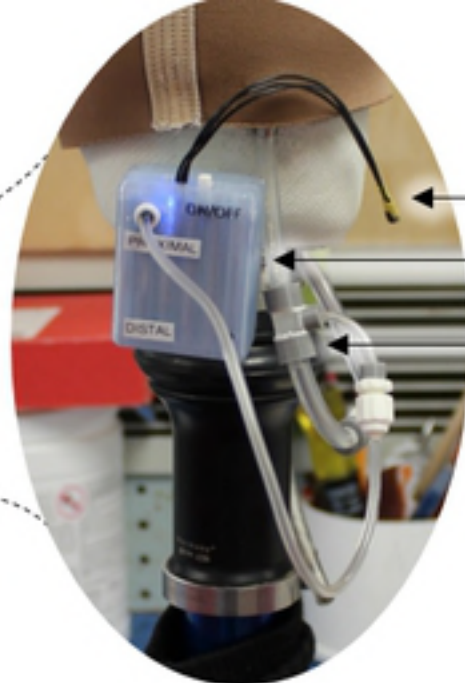

Temp. probe  
Data logger  
T-intersection

(a)

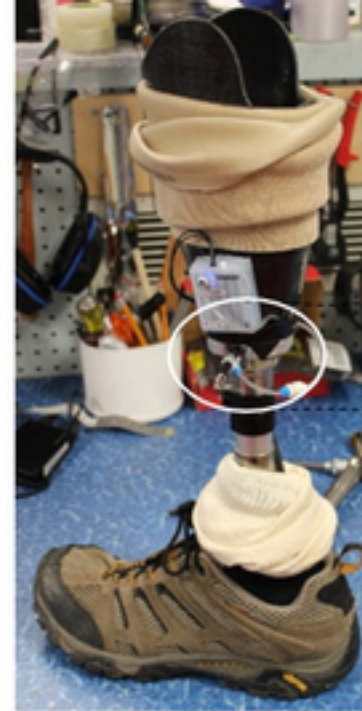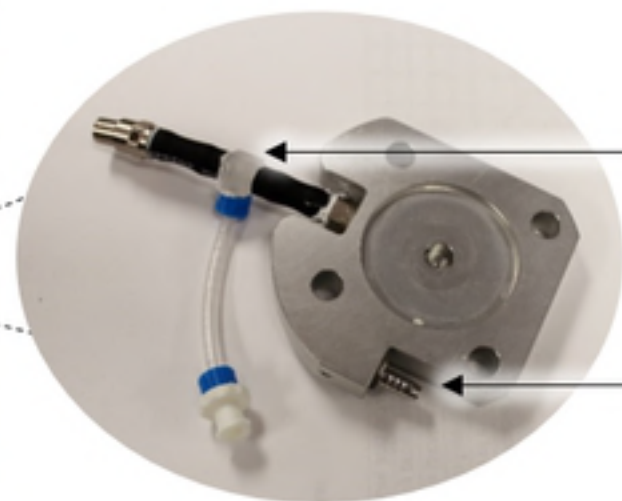

Splice in  
exhaust port  
Connection to  
pump

(b)

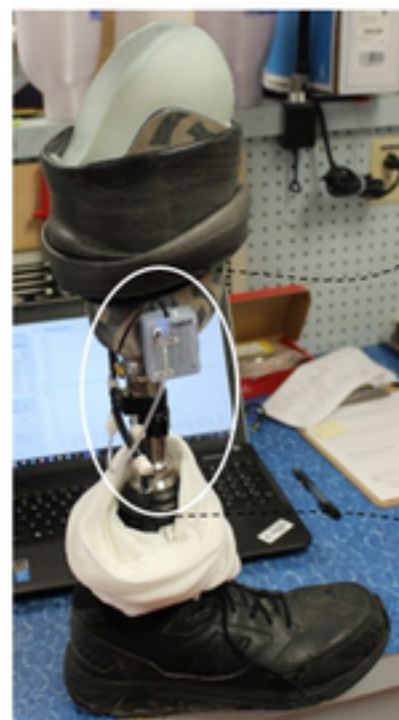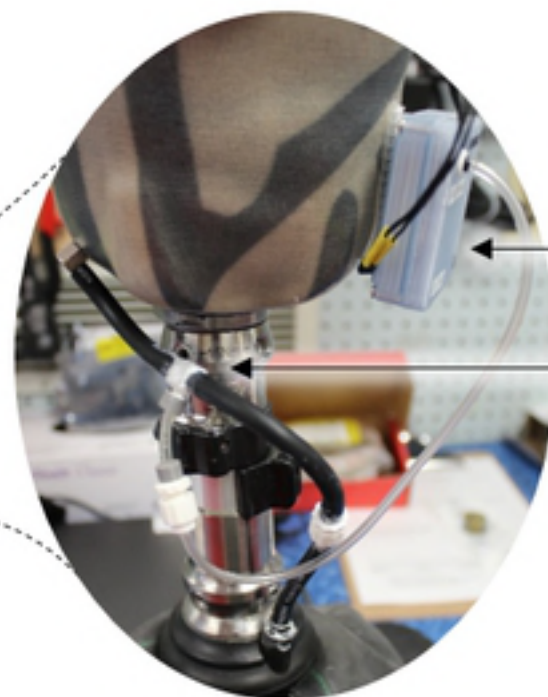

Data logger  
T-intersection

(c)

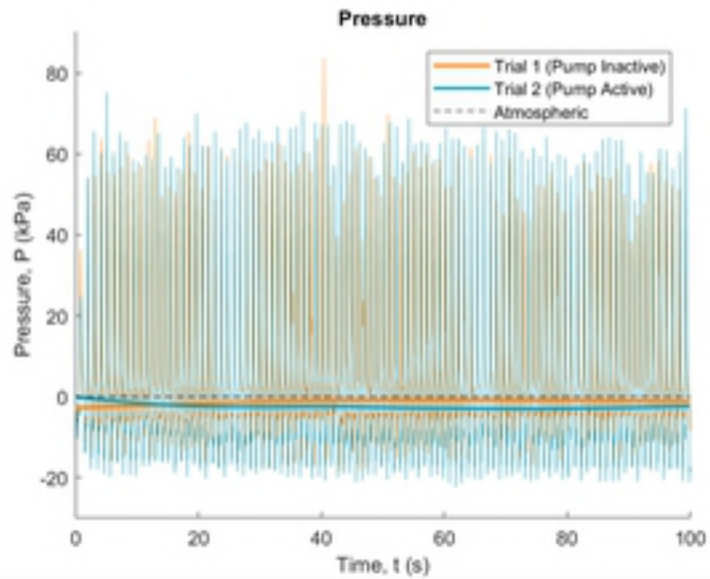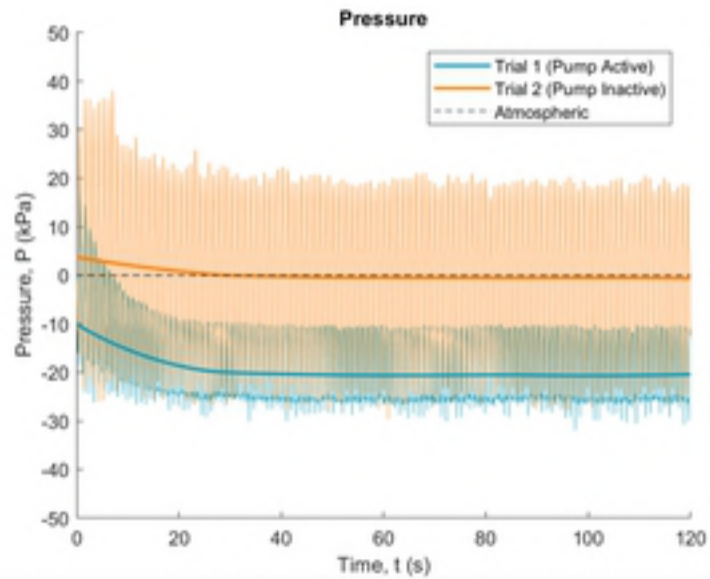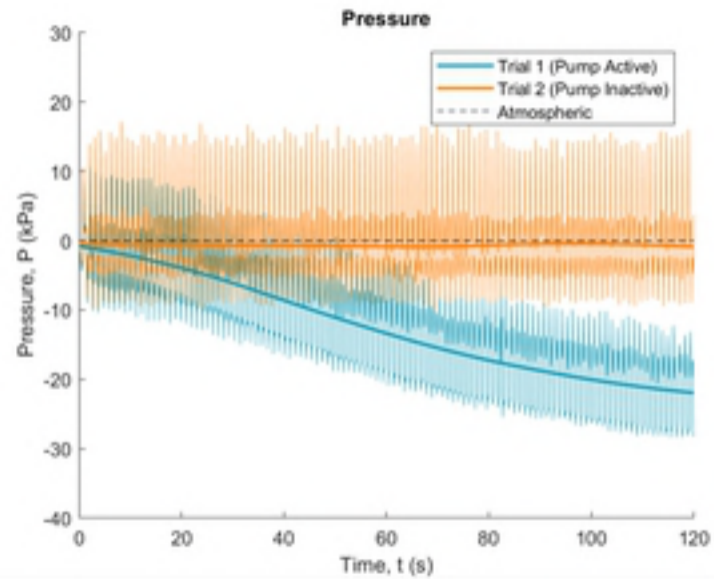

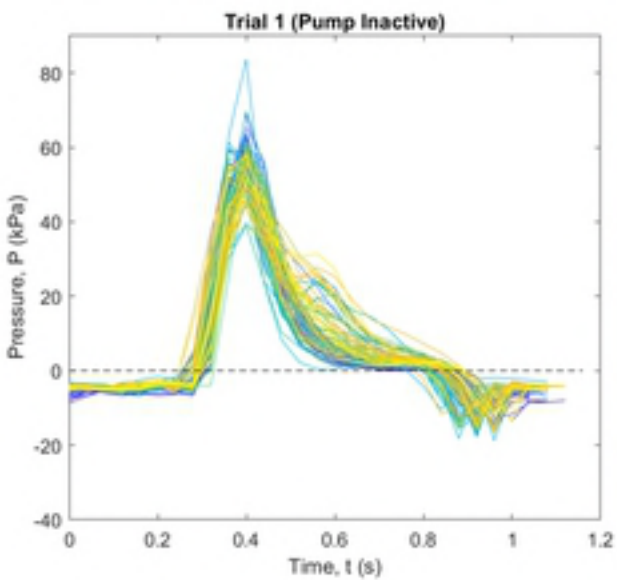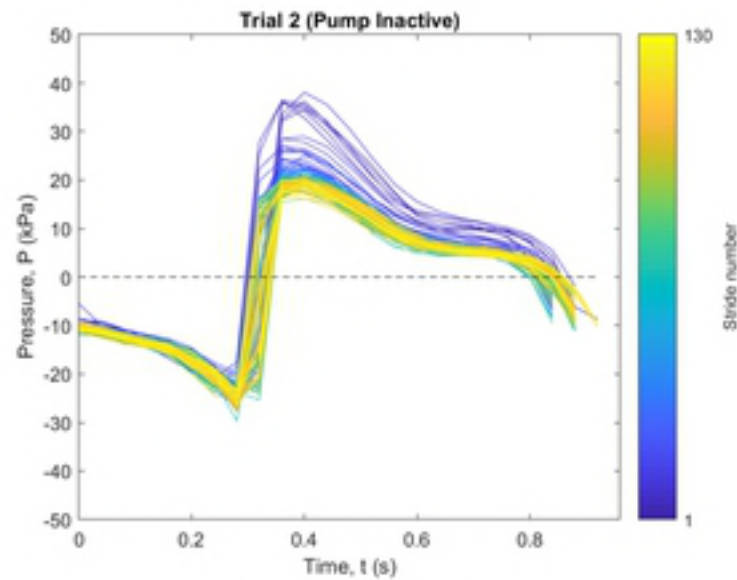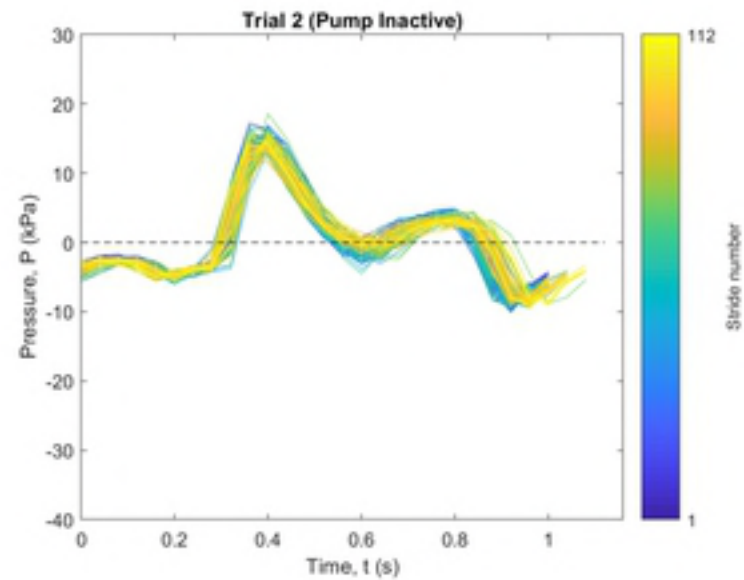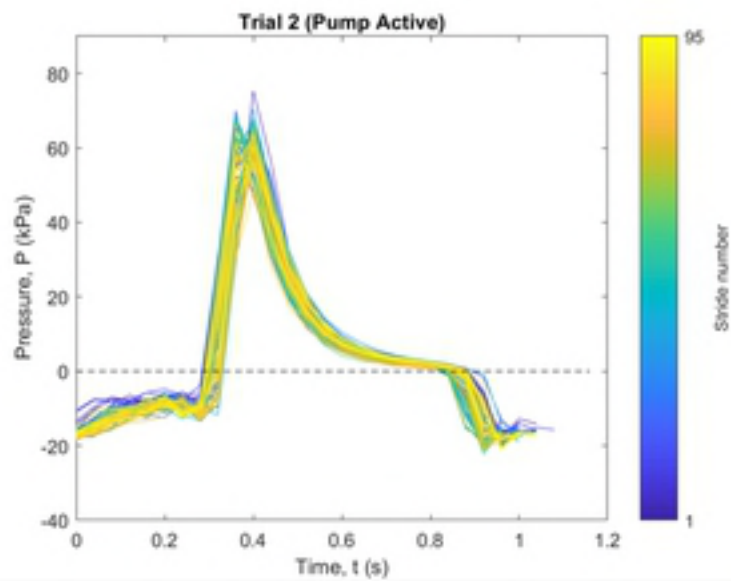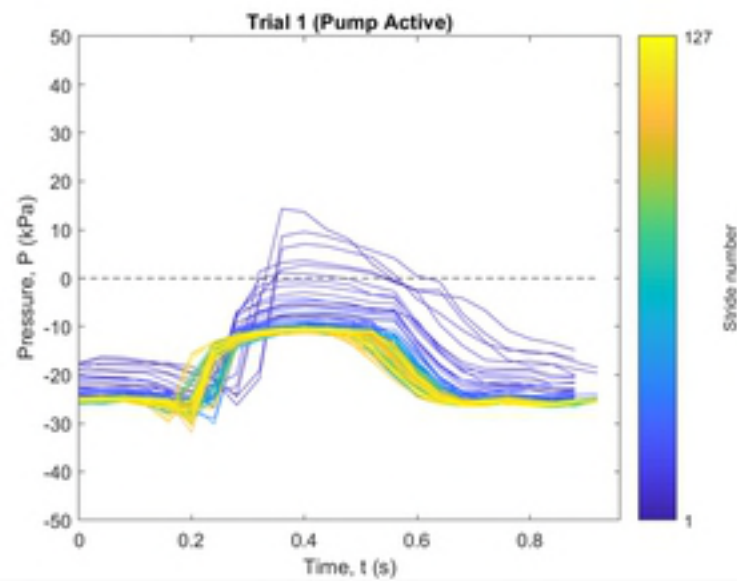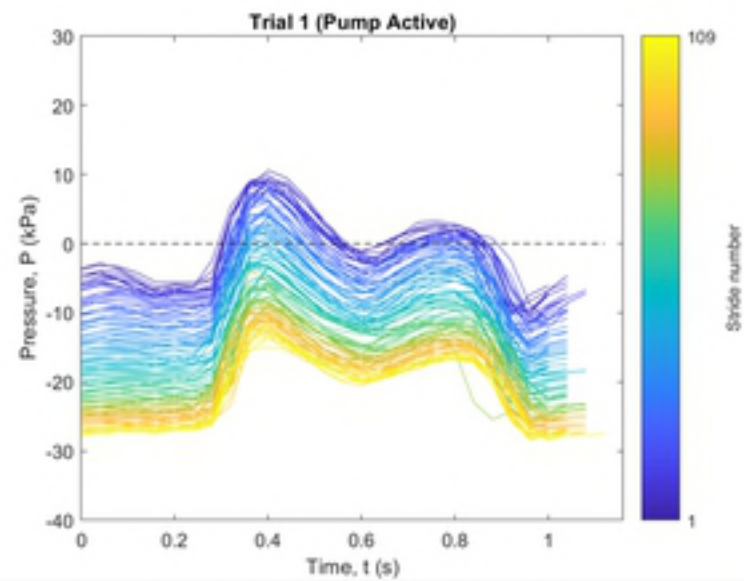



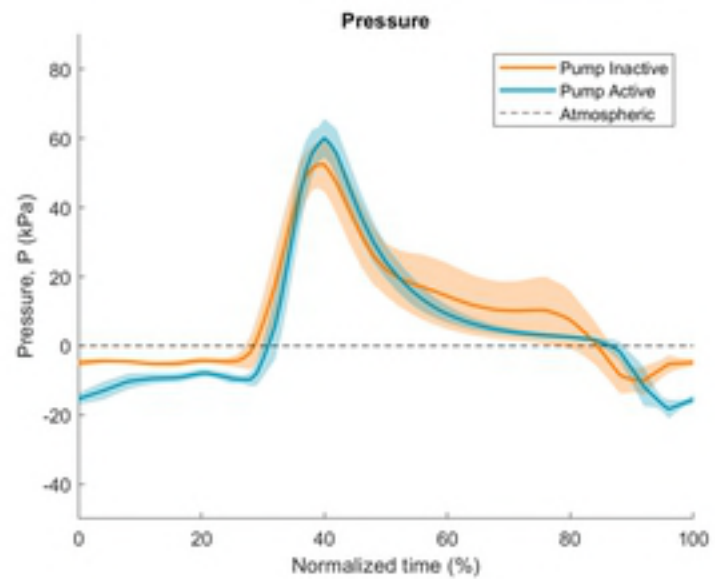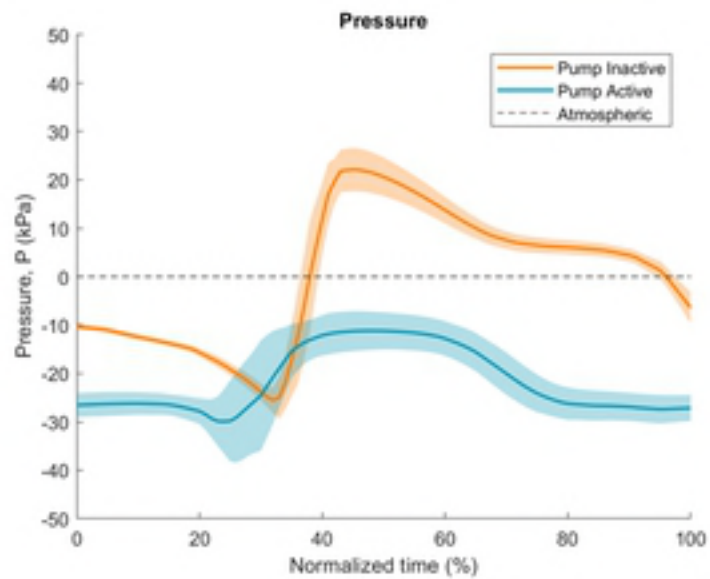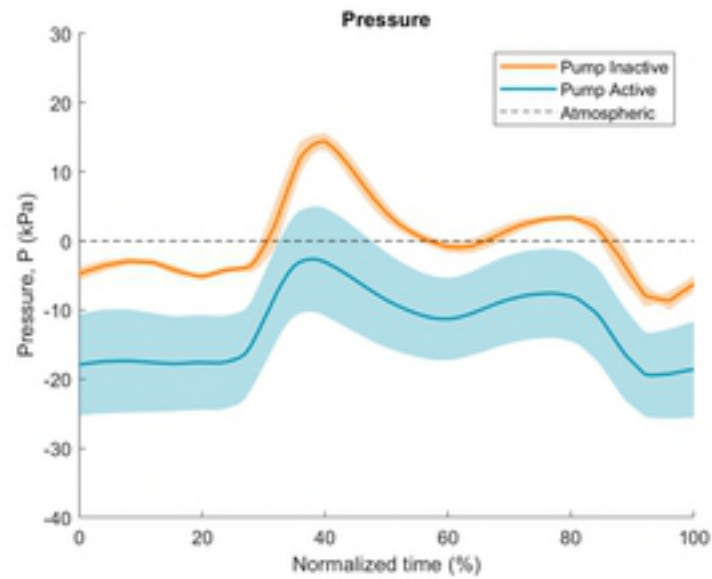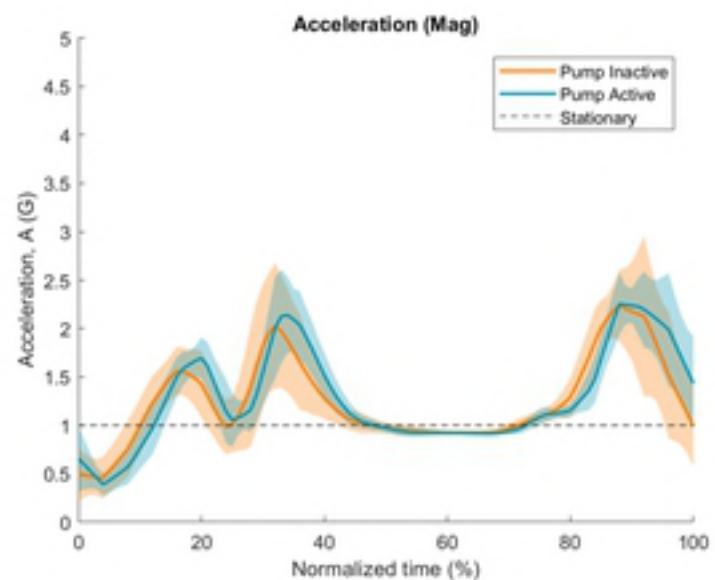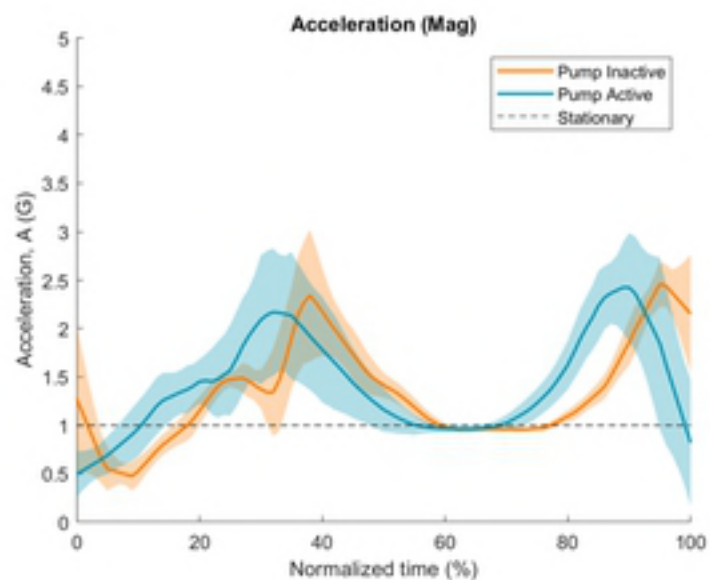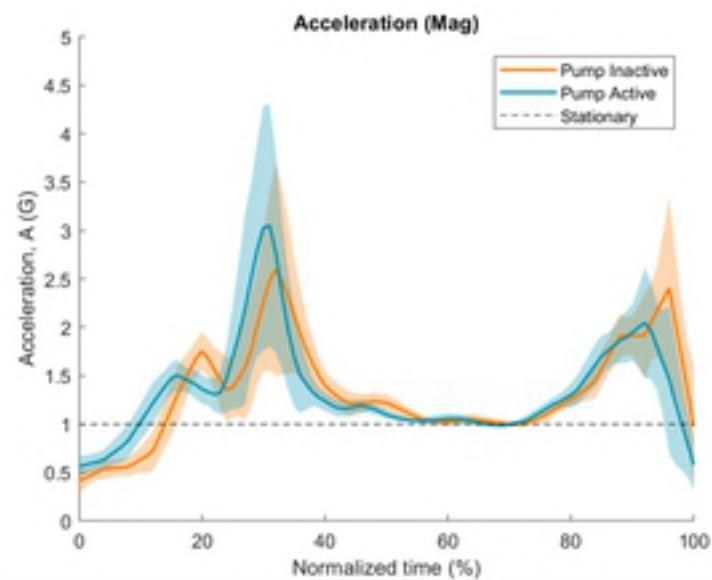

Strongly agree

Strongly disagree

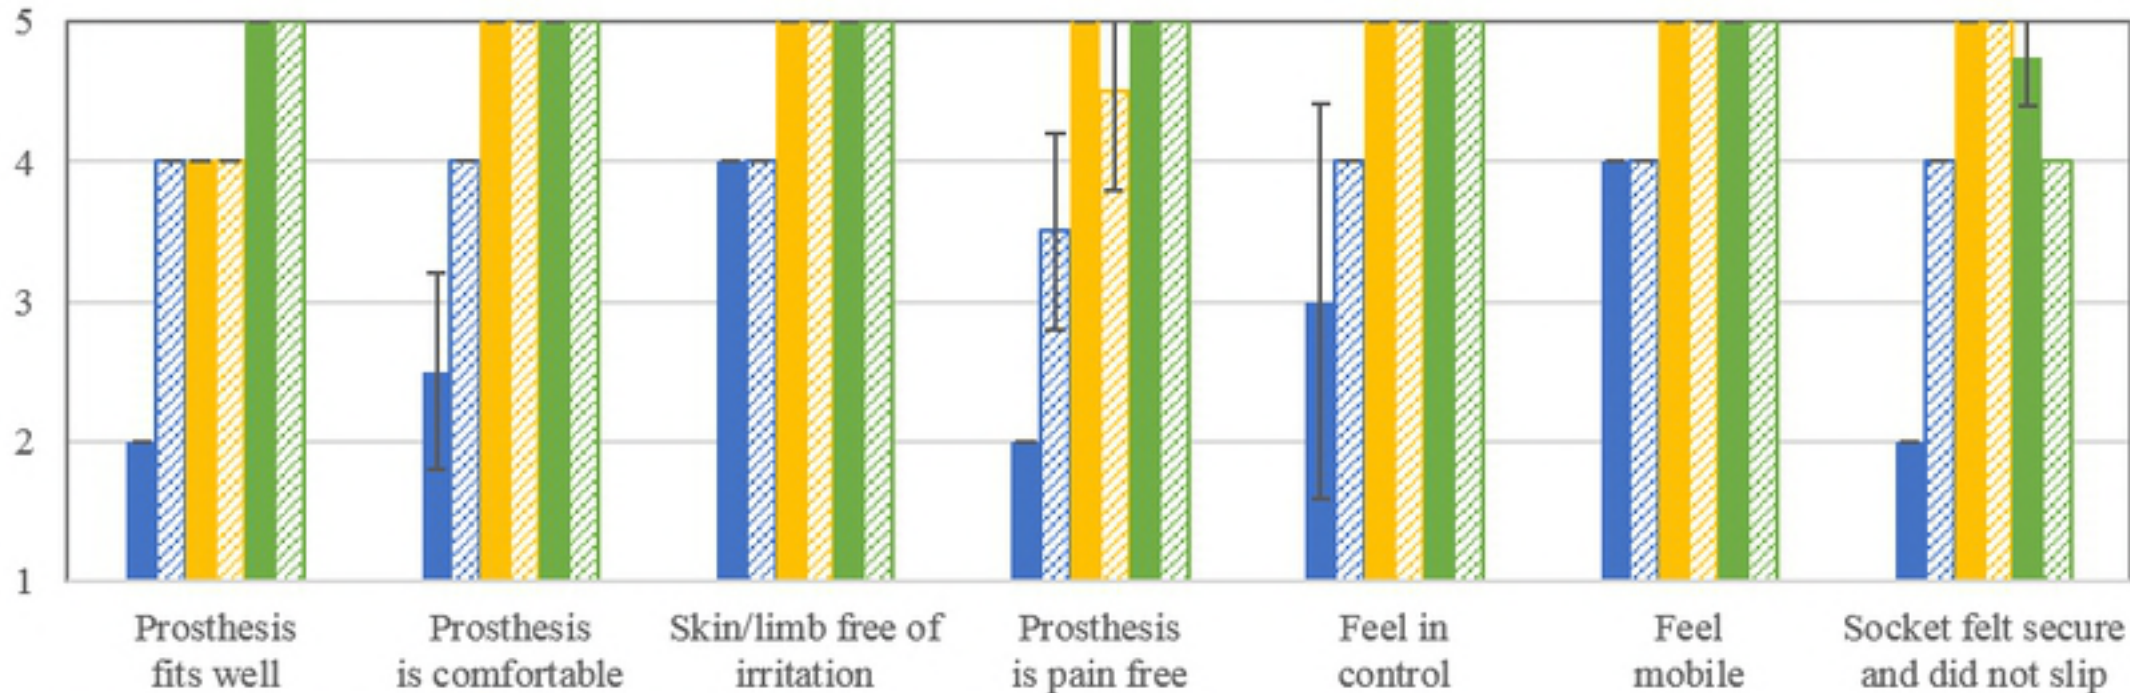

Participant 1 (Pump inactive)

Participant 1 (Pump active)

Participant 2 (Pump inactive)

Participant 2 (Pump active)

Participant 3 (Pump inactive)

Participant 3 (Pump active)
